# Supplementary material for: Flax lignan-fortified nanoemulsions potentiate the conversion of α-linolenic acid to n-3 LCPUFAs: cumulative metabolic patterns in non-fasting mice
Source: Royal Society of Chemistry journal article supplement (doi:10.1039/d5fo03469h), 2025-11-27
Supplement: d5fo03469h1.zip [file 1-Quantitative Results of Serum n-3 PUFAs - Time Cumulative Effect-Fig 2.xlsx]

## Sheet: Sheet1
Time	ALA content in serum (mg/mL)
	Control		Nano-E		FLM-N		SDG-N		SECO-N
	Mean	SD	Mean	SD	Mean	SD	Mean	SD	Mean	SD
14 days	0	0	0.19314	0.02934	0.17061	0.02031	0.1813	0.0251	0.17475	0.02197
28 days	0	0	0.1736	0.02179	0.16828	0.02508	0.21317	0.02665	0.19818	0.02818
42 days	0	0	0.2122	0.02052	0.191	0.01858	0.19568	0.01928	0.21498	0.02577
Time	EPA content in serum (mg/mL)
	Control		Nano-E		FLM-N		SDG-N		SECO-N
	Mean	SD	Mean	SD	Mean	SD	Mean	SD	Mean	SD
14 days	0	0	0.0281	0.00483	0.0366	0.00477	0.03414	0.00759	0.03543	0.00918
28 days	0	0	0.03268	0.0054	0.03541	0.01352	0.03281	0.00857	0.03223	0.00655
42 days	0	0	0.02518	0.00229	0.03321	0.00242	0.03476	0.00353	0.03273	0.00297
Time	DPA content in serum (mg/mL)
	Control		Nano-E		FLM-N		SDG-N		SECO-N
	Mean	SD	Mean	SD	Mean	SD	Mean	SD	Mean	SD
14 days	0	0	0.01768	0.00185	0.01485	0.00139	0.01315	0.00411	0.01378	0.00352
28 days	0	0	0.01584	0.00283	0.01745	0.00279	0.01905	0.00284	0.01318	0.00238
42 days	0	0	0.02473	0.0026	0.02388	0.00239	0.02353	0.00299	0.02248	0.00182
Time	DHA content in serum (mg/mL)
	Control		Nano-E		FLM-N		SDG-N		SECO-N
	Mean	SD	Mean	SD	Mean	SD	Mean	SD	Mean	SD
14 days	0.13996	0.01998	0.19575	0.02174	0.18805	0.01157	0.20067	0.03653	0.20466	0.03967
28 days	0.11691	0.01454	0.17757	0.01984	0.19516	0.02259	0.21042	0.0314	0.17011	0.0174
42 days	0.13414	0.01558	0.18539	0.01371	0.22278	0.02312	0.19482	0.01458	0.19152	0.02081
