# Supplementary material for: Flax lignan-fortified nanoemulsions potentiate the conversion of α-linolenic acid to n-3 LCPUFAs: cumulative metabolic patterns in non-fasting mice
Source: Royal Society of Chemistry journal article supplement (doi:10.1039/d5fo03469h), 2025-11-27
Supplement: d5fo03469h1.zip [file 2-Quantitative Results of Liver n-3 PUFAs - Time Cumulative Effect-Fig 2.xlsx]

## Sheet: Sheet1
Time	ALA content in liver (mg/g)
	Control		Nano-E		FLM-N		SDG-N		SECO-N
	Mean	SD	Mean	SD	Mean	SD	Mean	SD	Mean	SD
14 days	0	0	5.35808	0.39826	5.86994	0.73888	6.30567	0.47264	6.11798	0.63943
28 days	0	0	5.88781	0.59846	6.09165	0.63359	5.43275	0.90059	5.80242	0.85166
42 days	0	0	6.25675	0.72958	6.68168	0.6855	6.47337	0.5878	7.33039	0.75222
Time	EPA content in liver (mg/g)
	Control		Nano-E		FLM-N		SDG-N		SECO-N
	Mean	SD	Mean	SD	Mean	SD	Mean	SD	Mean	SD
14 days	0	0	0.57381	0.07318	0.63089	0.10218	0.62867	0.09167	0.70063	0.10142
28 days	0	0	0.65042	0.11257	0.60651	0.06938	0.64729	0.16208	0.59521	0.20873
42 days	0	0	0.57001	0.04999	0.7705	0.04799	0.8403	0.06947	0.90395	0.06865
Time	DPA content in liver (mg/g)
	Control		Nano-E		FLM-N		SDG-N		SECO-N
	Mean	SD	Mean	SD	Mean	SD	Mean	SD	Mean	SD
14 days	0	0	0.59736	0.04389	0.65931	0.12321	0.72625	0.04303	0.64827	0.13414
28 days	0	0	0.68775	0.09576	0.73429	0.08501	0.60487	0.15846	0.69078	0.22552
42 days	0	0	0.71489	0.06103	0.75276	0.084	0.7578	0.05444	0.84599	0.06253
Time	DHA content in liver (mg/g)
	Control		Nano-E		FLM-N		SDG-N		SECO-N
	Mean	SD	Mean	SD	Mean	SD	Mean	SD	Mean	SD
14 days	2.38083	0.31857	4.62583	0.49206	5.2775	0.78088	4.36775	0.29276	5.12892	0.60994
28 days	2.47879	0.329	4.7831	0.53217	5.01157	0.52625	4.7967	0.57576	4.96337	0.56399
42 days	2.64298	0.21144	5.19171	0.42785	5.48611	0.51855	5.76019	0.45039	6.11328	0.50119
