# Supplementary material for: Flax lignan-fortified nanoemulsions potentiate the conversion of α-linolenic acid to n-3 LCPUFAs: cumulative metabolic patterns in non-fasting mice
Source: Royal Society of Chemistry journal article supplement (doi:10.1039/d5fo03469h), 2025-11-27
Supplement: d5fo03469h1.zip [file 3-Serum Fatty Acid Percentage Composition and n-3 PUFAs Quantification-Fig 3.xlsx]

## Sheet: Sheet1
Percentage composition of serum fatty acids (%)
	14:0		16:0		16:1		18:0		18:1		18:2		18:3 n-3		18:3 n-6		20:1		20:3 n-6		20:4 n-6		20:5 n-3		22:0		22:1		22:5 n-3		22:6 n-3
	Mean	SD	Mean	SD	Mean	SD	Mean	SD	Mean	SD	Mean	SD	Mean	SD	Mean	SD	Mean	SD	Mean	SD	Mean	SD	Mean	SD	Mean	SD	Mean	SD	Mean	SD	Mean	SD
Control	0.23193	0.03023	18.9247	0.66228	1.34733	0.32223	21.6957	1.71276	35.5853	3.09917	12.9217	1.14666	0	0	0.21785	0.05395	0.35296	0.07289	0.14599	0.03879	6.08888	0.40726	0	0	0.56875	0.06195	0.50116	0.07414	0	0	1.41769	0.05385
NanoE	0.25438	0.03565	18.8449	0.34425	1.28674	0.43565	22.8042	1.48408	29.5202	2.31354	15.1716	0.92683	2.36013	0.74436	0.27332	0.07389	0.3523	0.03635	0.18225	0.04587	4.62775	0.45727	0.37856	0.05752	0.89378	0.08435	0.19366	0.05377	0.30458	0.03273	2.55161	0.30189
FLMN	0.22391	0.01185	18.8562	1.39575	1.21812	0.29925	22.9901	1.89205	29.7383	2.455	15.1641	0.78211	2.34098	0.29506	0.16173	0.03059	0.29478	0.06615	0.1657	0.02501	4.54112	1.1551	0.36332	0.11791	0.6072	0.04243	0.19025	0.014	0.34394	0.04276	2.80016	0.44094
SDGN	0.2177	0.0159	18.3998	0.16399	0.99144	0.08094	24.3882	0.98867	30.2128	0.76835	14.6198	0.39714	2.46083	0.14569	0.29902	0.08307	0.31068	0.0202	0.12387	0.02043	3.89577	0.24962	0.39037	0.06223	0.63962	0.02419	0.21293	0.00935	0.26237	0.04342	2.5748	0.08288
SECON	0.21045	0.02183	18.2915	0.66968	0.97686	0.15745	24.6391	2.83281	30.1318	2.51463	14.9985	0.72941	2.44087	0.58752	0.16033	0.01389	0.34428	0.01715	0.11663	0.00636	3.64824	0.43391	0.34789	0.03097	0.6322	0.07561	0.19062	0.02232	0.33582	0.03449	2.53495	0.21339
	ALA content in serum		EPA content in serum		DPA content in serum		DHA content in serum
	mg/mL		mg/mL		mg/mL		mg/mL
	Mean	SD	Mean	SD	Mean	SD	Mean	SD
Control	0	0	0	0	0	0	0.13414	0.01558
NanoE	0.2122	0.02052	0.02518	0.00229	0.02473	0.0026	0.18539	0.01371
FLMN	0.191	0.01858	0.03321	0.00242	0.02388	0.00239	0.22278	0.02312
SDGN	0.16568	0.01928	0.03476	0.00353	0.02353	0.00299	0.19482	0.01458
SECON	0.21498	0.02577	0.03273	0.00297	0.02248	0.00182	0.19152	0.02081
