# Supplementary material for: Flax lignan-fortified nanoemulsions potentiate the conversion of α-linolenic acid to n-3 LCPUFAs: cumulative metabolic patterns in non-fasting mice
Source: Royal Society of Chemistry journal article supplement (doi:10.1039/d5fo03469h), 2025-11-27
Supplement: d5fo03469h1.zip [file 4-Liver Fatty Acid Percentage Composition and n-3 PUFAs Quantification-Fig 3.xlsx]

## Sheet: Sheet1
Percentage composition of hepatic fatty acids (%)
	14:0		16:0		16:1		16:2		18:0		18:1		18:2		18:3 n-3		20:1		20:3 n-6		20:4 n-6		20:5 n-3		22:1		22:5 n-3		22:6 n-3
	Mean	SD	Mean	SD	Mean	SD	Mean	SD	Mean	SD	Mean	SD	Mean	SD	Mean	SD	Mean	SD	Mean	SD	Mean	SD	Mean	SD	Mean	SD	Mean	SD	Mean	SD
Control	0.57286	0.07146	23.2091	1.10005	5.56174	0.71042	0.26986	0.10221	0.24455	0.0519	30.6582	1.06606	26.4346	1.27541	0.20699	0.03723	0.44983	0.06326	0.33695	0.07605	6.77048	1.04925	0.05634	0.00702	2.42756	0.58737	0.18228	0.03455	2.6187	0.3927
NanoE	0.65064	0.06076	19.1958	0.71724	4.61325	0.29776	0.37882	0.01991	0.2772	0.03663	30.08	0.62111	29.0351	0.38584	4.80731	1.06806	0.42945	0.03096	0.22069	0.00917	3.57812	0.31885	0.43738	0.07017	1.94293	0.21011	0.52181	0.03388	3.8315	0.16214
FLMN	0.55805	0.0603	21.0913	0.25765	4.54815	0.66529	0.24975	0.02428	0.23245	0.03796	27.2891	0.9541	26.4681	1.04205	5.51458	0.8374	0.34637	0.02453	0.26172	0.01028	4.6724	0.8995	0.65421	0.0759	2.56084	0.49407	0.65266	0.04994	4.90031	0.67349
SDGN	0.50731	0.04282	20.5476	0.43863	3.74334	0.66088	0.23491	0.02023	0.23351	0.02035	27.193	0.52652	26.4598	0.44874	5.75494	1.03665	0.39937	0.09103	0.25504	0.02965	4.94102	1.05709	0.74924	0.15982	2.83697	0.37115	0.72594	0.05733	5.41804	0.7387
SECON	0.52454	0.04718	20.5935	0.4437	3.88863	0.54752	0.25619	0.03244	0.21275	0.0094	26.8825	0.83167	26.5852	0.31361	6.07622	1.77032	0.37431	0.0299	0.27902	0.01952	4.53226	0.69868	0.75317	0.17175	2.67936	0.37816	0.75939	0.07991	5.60293	0.25257
	ALA content in liver		EPA content in liver		DPA content in liver		DHA content in liver
	mg/g		mg/g		mg/g		mg/g
	Mean	SD	Mean	SD	Mean	SD	Mean	SD
Control	0	0	0	0	0	0	2.64298	0.21144
NanoE	6.25675	0.72958	0.57001	0.04999	0.71489	0.06103	5.19171	0.42785
FLMN	6.68168	0.6855	0.7705	0.04799	0.75276	0.084	5.48611	0.51855
SDGN	6.47337	0.5878	0.8403	0.06947	0.7578	0.05444	5.76019	0.45039
SECON	7.33039	0.75222	0.90395	0.06865	0.84599	0.06253	6.11328	0.50119
