# Supplementary material for: Flax lignan-fortified nanoemulsions potentiate the conversion of α-linolenic acid to n-3 LCPUFAs: cumulative metabolic patterns in non-fasting mice
Source: Royal Society of Chemistry journal article supplement (doi:10.1039/d5fo03469h), 2025-11-27
Supplement: d5fo03469h1.zip [file 5-Brain Tissue Fatty Acid Percentage Composition and n-3 PUFAs Quantification-Fig 4.xlsx]

## Sheet: Sheet1
Percentage of fatty acids in brain tissue (%)
	16:0		16:1		18:0		18:1		18:2		20:0		20:1		20:2		20:3		20:4 n-6		20:5 n-3		22:0		22:1		22:4		24:0		22:6 n-3
	Mean	SD	Mean	SD	Mean	SD	Mean	SD	Mean	SD	Mean	SD	Mean	SD	Mean	SD	Mean	SD	Mean	SD	Mean	SD	Mean	SD	Mean	SD	Mean	SD	Mean	SD	Mean	SD
Control	19.0361	0.12223	0.56498	0.02045	19.9248	0.13404	20.1857	0.16704	0.62839	0.02819	0.33536	0.0192	1.85476	0.09341	0.76492	0.03825	0.34822	0.01589	9.324	0.12694	0	0	2.7848	0.11942	2.54945	0.14225	2.96275	0.33108	0.69179	0.05199	18.044	0.39509
NanoE	18.9374	0.07122	0.53254	0.01191	19.708	0.10328	20.1147	0.16832	0.85949	0.03317	0.32166	0.01364	1.80427	0.03817	0.73318	0.02872	0.40671	0.03555	8.75085	0.05395	0.30531	0.00767	2.31177	0.08321	3.29496	0.42007	2.45776	0.09516	0.59329	0.05567	18.8681	0.2766
FLMN	18.6872	0.12071	0.53812	0.0083	19.6947	0.08639	20.3388	0.2256	0.76646	0.02893	0.32203	0.01678	1.94436	0.09815	0.75807	0.02635	0.42267	0.06684	8.69696	0.06115	0.25565	0.05226	2.23644	0.11632	3.50998	0.17759	2.54071	0.02273	0.56269	0.02026	18.7252	0.16652
SDGN	18.9647	0.24094	0.54486	0.01411	19.8041	0.14599	20.1811	0.26701	0.7891	0.05526	0.31878	0.0063	1.8169	0.09037	0.71272	0.03917	0.46968	0.04728	8.72926	0.15094	0.28828	0.06847	2.19961	0.13987	3.56147	0.12963	2.37559	0.03479	0.56643	0.00934	18.6775	0.15522
SECON	19.0881	0.16043	0.53502	0.01831	19.7403	0.11167	20.2072	0.18137	0.84227	0.06676	0.30551	0.0037	1.82174	0.04794	0.73872	0.04181	0.42903	0.05438	8.75393	0.07588	0.2959	0.07944	2.1761	0.17014	3.17549	0.39061	2.49678	0.07067	0.53149	0.03581	18.8624	0.35619
	EPA content in brain tissue		DHA content in brain tissue
	mg/g		mg/g
	Mean	SD	Mean	SD
Control	0	0	6.20109	0.06367
NanoE	0.10377	0.00771	6.74497	0.09171
FLMN	0.09587	0.01094	6.72616	0.12557
SDGN	0.10048	0.00935	6.6015	0.08642
SECON	0.09977	0.00829	6.58249	0.04478
