# Supplementary material for: Flax lignan-fortified nanoemulsions potentiate the conversion of α-linolenic acid to n-3 LCPUFAs: cumulative metabolic patterns in non-fasting mice
Source: Royal Society of Chemistry journal article supplement (doi:10.1039/d5fo03469h), 2025-11-27
Supplement: d5fo03469h1.zip [file 6-Adipose Tissue Fatty Acid Percentage Composition and n-3 PUFAs Quantification-Fig 4.xlsx]

## Sheet: Sheet1
Percentage of fatty acids in brain tissue (%)
	14:0		16:0		16:1		18:0		18:1		18:2		18:3 n-3		20:1		20:2		20:3 n-6		20:4 n-6		20:5 n-3		22:1		22:5 n-3		22:6 n-3
	Mean	SD	Mean	SD	Mean	SD	Mean	SD	Mean	SD	Mean	SD	Mean	SD	Mean	SD	Mean	SD	Mean	SD	Mean	SD	Mean	SD	Mean	SD	Mean	SD	Mean	SD
Control	0.84151	0.09064	16.5993	1.74813	6.25093	0.24658	0.2574	0.0304	39.9572	1.26112	32.8015	2.49581	0.46677	0.07842	1.07845	0.13961	0.22514	0.03953	0.21786	0.01411	0.37894	0.02828	0.00719	0.00186	0.78621	0.07201	0.04517	0.00226	0.08637	0.00534
NanoE	0.74495	0.05128	16.0737	1.40533	5.30625	0.31279	0.28082	0.01155	39.0283	0.53706	32.8742	1.68028	2.90784	0.50928	0.97629	0.12503	0.20253	0.00204	0.18384	0.00714	0.23932	0.00946	0.05041	0.01579	0.70754	0.0363	0.16638	0.02476	0.25759	0.04897
FLMN	0.72836	0.07124	16.0965	1.60393	6.02287	0.53488	0.30132	0.02532	38.5834	0.52527	32.9258	1.65339	2.70885	0.42333	0.89926	0.13579	0.2039	0.003	0.18838	0.00502	0.2587	0.00275	0.05845	0.01884	0.65607	0.00716	0.147	0.01213	0.22115	0.02013
SDGN	0.80042	0.05607	17.0725	1.34435	4.99291	0.35331	0.25735	0.02045	38.6219	0.44622	32.2663	1.15005	3.1755	0.40065	1.04562	0.07194	0.20591	0.0027	0.17398	0.01044	0.24737	0.01467	0.05087	0.01121	0.69204	0.00374	0.16242	0.04296	0.23488	0.04319
SECON	0.72886	0.04436	15.4759	1.24649	4.92336	0.40185	0.2976	0.02359	38.4757	1.13336	33.9599	1.24232	3.37875	0.55703	0.93699	0.02584	0.19859	0.01913	0.16342	0.00966	0.24505	0.03988	0.053	0.00833	0.76691	0.11428	0.15547	0.0303	0.24053	0.00538
	ALA content in adipose tissue		EPA content in adipose tissue		DPA content in adipose tissue		DHA content in adipose tissue
	mg/g		mg/g		mg/g		mg/g
	Mean	SD	Mean	SD	Mean	SD	Mean	SD
Control	0	0	0		0	0	0.65025	0.04869
NanoE	22.0962	1.57357	0.38437	0.0456	1.26096	0.1201	1.9535	0.12307
FLMN	21.9759	1.30075	0.47533	0.05941	1.19045	0.10528	1.79034	0.19045
SDGN	25.1907	1.42183	0.40343	0.05123	1.28896	0.13305	1.86306	0.17503
SECON	25.159	1.8201	0.39397	0.04152	1.15814	0.16346	1.76999	0.14085
