# Supplementary material for: Flax lignan-fortified nanoemulsions potentiate the conversion of α-linolenic acid to n-3 LCPUFAs: cumulative metabolic patterns in non-fasting mice
Source: Royal Society of Chemistry journal article supplement (doi:10.1039/d5fo03469h), 2025-11-27
Supplement: d5fo03469h1.zip [file 7-Serum n-3 PUFA Lipidomics Quantitative Results-Fig 5.xlsx]

## Sheet: Sheet1
lipid name	NanoE1	NanoE2	NanoE3	FLM-N1	FLM-N2	FLM-N3	SDG-N1	SDG-N2	SDG-N3	SECO-N1	SECO-N2	SECO-N3
CE 18:3	0.00351181	0.00256819	0.00447567	0.00352042	0.00204289	0.00170781	0.00292606	0.00383998	0.0027366	0.00400362	0.00453805	0.00498259
CE 20:5	0.00251711	0.000793465	0.00105842	0.00130999	0.00290488	0.00124769	0.00172833	0.00164476	0.00221204	0.00169492	0.00251533	0.00248435
CE 22:6	0.0198665	0.00786202	0.00867206	0.0127892	0.0194495	0.0107752	0.0169402	0.0132869	0.0149765	0.0131291	0.0163652	0.0154496
DG 34:4| 16:1_18:3	0.762015	1.02852	0.945169	0.432257	0.606701	0.75706	0.501236	0.641618	0.671333	0.487546	0.700866	0.650008
DG 36:5| 18:2_18:3	3.8701	5.08915	5.32515	2.50335	4.04928	2.28484	3.19992	3.08846	3.75667	2.66529	4.03132	4.79049
DG 36:6| 18:3_18:3	1.26722	2.37865	2.63341	0.856903	1.09911	0.868308	0.873475	1.28926	2.29319	1.40127	2.26269	3.34218
DG 40:7| 18:1_22:6	0.695941	0.78941	0.74171	0.769927	0.752264	0.764985	0.944322	0.760862	0.495428	0.657145	0.468265	0.478051
DG 40:8| 18:2_22:6	1.03552	1.02198	1.03477	1.11024	1.06785	1.05339	1.8283	0.919976	0.909453	1.05915	0.88126	0.61567
FA 18:3	177.314	294.556	377.446	169.567	193.526	167.35	140.172	185.832	213.672	295.279	346.791	331.208
FA 20:5	9.86822	11.1029	10.0192	13.0978	8.30181	9.70822	11.7996	10.3533	9.65928	11.0272	12.8891	11.0858
FA 22:5	15.2536	15.1994	14.5125	16.2794	14.8483	15.6018	18.4165	14.5061	11.5186	13.7392	17.0575	16.8238
FA 22:6	107.602	83.8042	109.888	74.6572	114.3	93.6032	95.9103	98.0084	73.8627	104.828	90.6744	76.9073
LPC 18:3	16.1199	18.3796	21.9666	15.5014	12.2838	8.45964	18.2665	13.6274	23.1805	17.4669	24.7247	22.784
LPC 20:5	1.2466	1.07289	0.938216	1.18442	1.605	1.37048	1.1195	1.16251	1.82474	1.11767	1.87763	1.33633
LPC 22:5	2.89003	4.22575	3.05202	5.49757	3.03317	3.01968	3.83628	3.7611	3.79073	3.97989	4.96555	3.82771
LPC 22:6	64.1487	29.4588	35.1909	42.2628	53.9451	41.923	42.4737	45.0601	43.5111	34.3452	46.7362	31.4612
LPE 22:5	2.83206	3.57483	3.66879	3.25715	3.14325	3.08831	3.32801	3.09246	4.2698	3.04472	3.86242	3.3147
LPE 22:6	18.371	13.6637	14.5546	15.6101	15.8249	15.647	19.5767	15.5334	15.1662	13.033	11.3417	11.5955
PC 34:3| 16:0_18:3	70.6945	83.3649	97.5074	57.566	72.3892	33.4063	57.4109	58.2528	78.5852	67.9353	88.9494	100.16
PC 36:5| 18:2_18:3	8.85924	8.10244	20.2126	9.27821	8.74388	4.48544	8.04161	10.6072	10.8453	14.8261	17.2037	15.7016
PC 38:6| 16:0_22:6	95.7296	87.5162	68.471	92.1892	121.106	98.2146	107.765	93.3517	85.3641	116.767	110.867	114.927
PC 38:7| 18:2_20:5	6.72046	5.85643	5.87544	7.25302	8.02837	8.97802	6.5631	7.70219	6.06145	7.64626	6.79136	6.98786
PC 39:6| 18:3_21:3	1.38113	1.58141	1.41885	1.72999	1.26362	1.33562	1.33986	1.72518	1.31426	1.6267	1.50151	1.39937
PC 40:6| 18:0_22:6	80.012	48.1722	66.3748	60.1404	70.6274	63.2181	70.7737	69.5834	47.0172	55.4995	58.8942	51.7657
PC 40:7| 18:1_22:6	15.5969	12.4345	9.17012	12.4319	15.9304	12.0096	15.786	14.0377	13.4841	12.8892	15.0253	11.4613
PC 42:9| 20:3_22:6	8.38688	5.12926	6.58469	6.71319	7.39847	6.54442	7.91864	6.92727	4.16397	5.0738	5.84538	4.66822
PE 34:3| 16:0_18:3	0.317204	0.223175	0.409821	0.131424	0.429255	0.185605	0.310041	0.179815	0.369013	0.293883	0.351193	0.3122
PI 40:6| 18:0_22:6	0.240106	0.213096	0.221715	0.425004	0.601066	0.537379	0.268264	0.446503	0.974992	0.243446	0.405256	0.273513
TG 50:5| 14:0_18:2_18:3	8.67809	12.5006	12.6873	3.20442	4.70751	10.5108	3.18428	6.496	6.91972	2.43502	14.8274	7.44712
TG 50:6| 14:1_18:2_18:3	3.10936	4.38174	5.00956	1.55677	2.31144	4.26016	1.28132	2.4395	3.4294	1.03817	5.02519	3.15163
TG 52:5| 16:0_18:2_18:3	108.539	177.497	152.386	56.6122	75.7051	146.487	66.1156	96.6749	97.899	62.8187	169.937	82.9894
TG 52:6| 16:1_18:2_18:3	36.9839	72.0087	62.5922	20.1136	51.4037	27.9707	19.7174	35.0642	46.6399	22.951	35.6552	69.2845
TG 52:7| 16:1_18:3_18:3	7.36374	12.8507	12.1728	3.22582	10.7538	6.44268	3.53107	6.40934	8.89179	4.40032	6.64396	11.5536
TG 52:8| 14:1_18:2_20:5	1.12689	2.02146	3.07737	1.03454	2.76738	2.88102	1.90672	2.65719	3.17248	1.66125	2.02924	2.56599
TG 52:9| 18:2_18:3_16:4	0.581052	0.807004	0.975384	0.421152	0.702021	1.18099	0.643364	0.780409	0.81366	0.393968	0.753095	1.40353
TG 54:6| 18:1_18:2_18:3	135.194	182.581	196.736	74.1392	195.549	95.6734	95.9404	111.217	127.775	90.2953	109.159	179.582
TG 54:7| 18:2_18:2_18:3	51.7263	89.8812	98.4193	23.9177	61.0881	24.034	31.4779	44.3051	76.3018	45.4103	70.9972	114.009
TG 54:8| 18:2_18:3_18:3	24.1274	52.6309	52.5793	14.6163	24.7592	13.998	15.235	23.8844	43.9593	25.1658	41.6776	66.9458
TG 54:9| 18:3_18:3_18:3	8.47062	22.7605	22.9305	4.94949	6.6612	5.45688	4.69191	9.54446	21.775	10.748	21.5266	38.1781
TG 54:10| 18:2_16:3_20:5	0.414935	0.406166	0.438331	0.542656	0.539118	0.732127	0.468729	0.541556	0.783704	0.394276	0.481823	0.562597
TG 56:8| 16:0_18:2_22:6	23.5428	28.6621	23.8726	24.1746	28.9177	22.0453	33.961	23.2863	14.2856	18.266	13.6889	15.5809
TG 56:9| 18:2_18:2_20:5	16.159	14.9033	17.5039	15.4961	18.459	17.2759	18.5248	17.9897	20.6556	17.5821	20.6111	19.9562
TG 56:10| 18:2_18:3_20:5	4.45917	4.9285	5.37663	5.31093	5.54593	6.33538	5.49102	5.15081	7.43596	4.30079	6.93183	6.15304
TG 56:11| 18:2_18:4_20:5	0.923902	1.5676	1.3744	1.16396	1.03345	1.82108	0.918421	1.38374	2.41392	1.24845	1.31909	1.33727
TG 58:8| 18:1_18:2_22:5	5.43638	4.32906	4.31491	5.9945	7.69614	7.29601	7.36399	6.59813	5.79846	6.58435	7.17913	7.04212
TG 58:9| 18:1_18:2_22:6	11.5618	16.8879	13.5411	13.9098	13.9234	14.5167	17.9462	13.2928	12.2527	15.5769	10.2429	8.84648
TG 58:10| 18:2_18:2_22:6	11.4941	12.1212	12.4919	15.092	11.9485	12.8409	11.3443	12.0179	12.0701	15.8419	10.7256	8.94226
TG 58:11| 18:2_20:4_20:5	7.78975	5.75812	7.02316	6.12462	7.86707	7.12473	10.3748	7.40842	9.01259	9.75335	8.10891	7.36914
TG 58:12| 18:3_20:4_20:5	2.87102	1.56476	2.98193	2.91772	2.73527	4.53251	1.83676	3.00427	2.42272	3.74621	3.42753	2.57844
TG 58:13| 18:3_20:5_20:5	0.193932	0.333324	0.280201	0.328788	0.270625	0.407645	0.480034	0.39247	0.567982	0.372826	0.37907	0.305645
TG 60:5| 18:1_24:1_18:3	0.287831	0.266191	0.487493	0.17136	0.375791	0.213143	0.226817	0.268021	0.221645	0.167687	0.247735	0.424177
TG 60:6| 24:1_18:2_18:3	0.210905	0.197987	0.332885	0.134463	0.274819	0.169399	0.226906	0.181696	0.173794	0.135682	0.187416	0.322494
TG 60:9| 20:1_18:2_22:6	0.833624	1.15374	0.872572	0.954334	0.79755	0.897772	1.79715	0.876654	0.788265	0.832441	0.643658	0.725051
TG 60:10| 18:1_20:4_22:5	0.84078	0.609448	0.636495	0.926527	0.977768	0.888091	1.58715	0.96081	0.94149	0.902293	0.823031	0.85913
TG 60:12| 18:2_20:4_22:6	3.10213	2.97103	2.57612	4.30026	2.96403	4.28437	5.59796	3.96631	4.09242	4.45083	3.2675	2.66065
TG 62:14| 20:4_20:4_22:6	0.715668	0.548303	0.509467	1.8484	0.7857	0.688437	0.899184	0.43485	0.747529	1.2994	0.69319	0.356657
TG 62:15| 20:4_20:5_22:6	0.288994	0.339787	0.288978	0.46284	0.300639	0.561401	0.529588	0.444742	0.673066	0.432154	0.395528	0.332313
TG 62:16| 20:5_20:5_22:6	0.0855294	0.0943615	0.0847743	0.116591	0.13057	0.187629	0.123644	0.1098	0.148981	0.11601	0.119916	0.0746595

## Sheet: Sheet2
			Mean	SD
	PC 38:6| 16:0_22:6	NanoE	83.9056	13.9834
		FLMN	103.837	15.2563
		SDGN	95.4937	11.3531
		SECON	114.187	3.01851
	PC 38:7| 18:2_20:5	NanoE	6.15078	0.493451
		FLMN	8.08647	0.863965
		SDGN	6.77558	0.840754
		SECON	7.14183	0.447767
	TG 56:9| 18:2_18:2_20:5	NanoE	16.1887	1.30057
		FLMN	17.077	1.49143
		SDGN	19.0567	1.4103
		SECON	19.3831	1.59376
	TG 58:8| 18:1_18:2_22:5	NanoE	4.69345	0.643435
		FLMN	6.99555	0.88972
		SDGN	6.58686	0.782826
		SECON	6.9352	0.311473
	TG 58:13| 18:3_20:5_20:5	NanoE	0.269152	0.0703497
		FLMN	0.335686	0.0687698
		SDGN	0.480162	0.0877561
		SECON	0.352514	0.040709
	TG 60:10| 18:1_20:4_22:5	NanoE	0.695575	0.126477
		FLMN	0.930796	0.0449906
		SDGN	1.16315	0.367322
		SECON	0.861485	0.0396837
	TG 60:12| 18:2_20:4_22:6	NanoE	2.88309	0.27381
		FLMN	3.84955	0.766927
		SDGN	4.55223	0.90782
		SECON	3.45966	0.910429
	TG 62:15| 20:4_20:5_22:6	NanoE	0.30592	0.0293302
		FLMN	0.441627	0.131669
		SDGN	0.549132	0.11541
		SECON	0.386665	0.0505071
	TG 62:16| 20:5_20:5_22:6	NanoE	0.0882218	0.0053306
		FLMN	0.14493	0.0376332
		SDGN	0.127475	0.0198693
		SECON	0.103529	0.0250775
