# Supplementary material for: Flax lignan-fortified nanoemulsions potentiate the conversion of α-linolenic acid to n-3 LCPUFAs: cumulative metabolic patterns in non-fasting mice
Source: Royal Society of Chemistry journal article supplement (doi:10.1039/d5fo03469h), 2025-11-27
Supplement: d5fo03469h1.zip [file 8-Liver Flax Lignans and Metabolites Content-Fig 6.xlsx]

## Sheet: Sheet1
		FLM-containing emulsion group
		Contents of lignans and metabolites in liver (μg/g)
		Time	SECO		END		ENL
			Mean	SD	Mean	SD	Mean	SD
		1 h	0.01912	0.0044	0.01355	0.00312	0.05979	0.00837
		3 h	0.03243	0.00584	0.01883	0.00245	0.21209	0.03818
		6 h	0.03678	0.00772	0.0299	0.00658	1.0097	0.18175
		12 h	0.04148	0.01037	0.01103	0.0011	0.44731	0.06262
		24 h	0.02551	0.00587	0	0	0.08114	0.01704
		SDG-containing emulsion group
		Contents of lignans and metabolites in liver (μg/g)
		Time	SDG		SECO		END		ENL
			Mean	SD	Mean	SD	Mean	SD	Mean	SD
		1 h	0.12221	0.02078	0.02019	0.00485	0.01476	0.00177	0.07379	0.01328
		3 h	0.21597	0.04103	0.02558	0.00435	0	0	0.13431	0.02283
		6 h	0.07505	0.01351	0.20243	0.02834	0.01425	0.00185	0.17536	0.04209
		12 h	0	0	0.0507	0.01268	0.07047	0.01762	0.09974	0.01197
		24 h	0	0	0.00779	0.00179	0	0	0.09732	0.02433
		SECO-containing emulsion group
		Contents of lignans and metabolites in liver (μg/g)
		Time	SECO		END		ENL
			Mean	SD	Mean	SD	Mean	SD
		1 h	0.15726	0.02988	0.01341	0.00215	0.10497	0.01994
		3 h	0.20897	0.04179	0.01869	0.00262	0.0694	0.00902
		6 h	0.21984	0.03078	0.01257	0.00201	0.10794	0.02483
		12 h	0.04839	0.00919	0.0204	0.00286	0.09931	0.01788
		24 h	0.03863	0.00386	0.02946	0.00383	0.09656	0.01159
