# Supplementary material for: Flax lignan-fortified nanoemulsions potentiate the conversion of α-linolenic acid to n-3 LCPUFAs: cumulative metabolic patterns in non-fasting mice
Source: Royal Society of Chemistry journal article supplement (doi:10.1039/d5fo03469h), 2025-11-27
Supplement: d5fo03469h1.zip [file 9-Quantitative n-3 PUFAs in Cells and Medium-Fig 7.xlsx]

## Sheet: Sheet1
		18:3 n-3 content in cells		20:3 n-3 content in cells		20:4 n-3 content in cells
		μg/mg protein		μg/mg protein		μg/mg protein
		Mean	SD	Mean	SD	Mean	SD
	Control	0	0	0	0	0	0
	ALA	13.611	0.06692	2.134	0.17288	1.10105	0.01172
	SDG-A	13.2788	1.16081	1.88232	0.16224	1.63099	0.3407
	SECO-A	13.743	1.21442	2.1891	0.16113	1.20238	0.18811
	END-A	13.6033	0.87142	2.37303	0.18727	1.04446	0.05544
	ENL-A	16.753	0.263	3.17075	0.24595	0	0
		18:3 n-3 content in medium
		μg/mL
		Mean	SD
	Control	0	0
	ALA	2.72529	0.23724
	SDG-A	2.7396	0.05514
	SECO-A	2.44773	0.03492
	END-A	2.63365	0.02902
	ENL-A	1.63307	0.00225
