# Supplementary material for: Flax lignan-fortified nanoemulsions potentiate the conversion of α-linolenic acid to n-3 LCPUFAs: cumulative metabolic patterns in non-fasting mice
Source: Royal Society of Chemistry journal article supplement (doi:10.1039/d5fo03469h), 2025-11-27

**Supplementary Figure 1.** Recorded changes in body weight of mice at various stages during the experiment

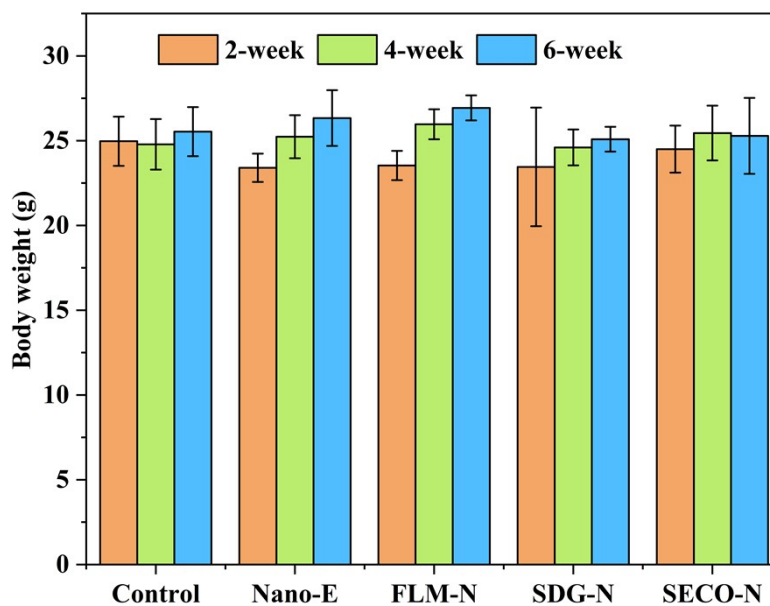

**Supplementary Table 1.** The average particle size of nanoemulsions in the current experiment

| Different emulsion groups | Mean particle diameter (nm) |
|---------------------------|-----------------------------|
| NanoE                     | $255 \pm 8$                 |
| FLM-N                     | $263 \pm 11$                |
| SDG-N                     | $237 \pm 5$                 |
| SECO-N                    | $230 \pm 5$                 |

**Supplementary Figure 2.** The turbiscan stability index (TSI) of nanoemulsions in the current experiment

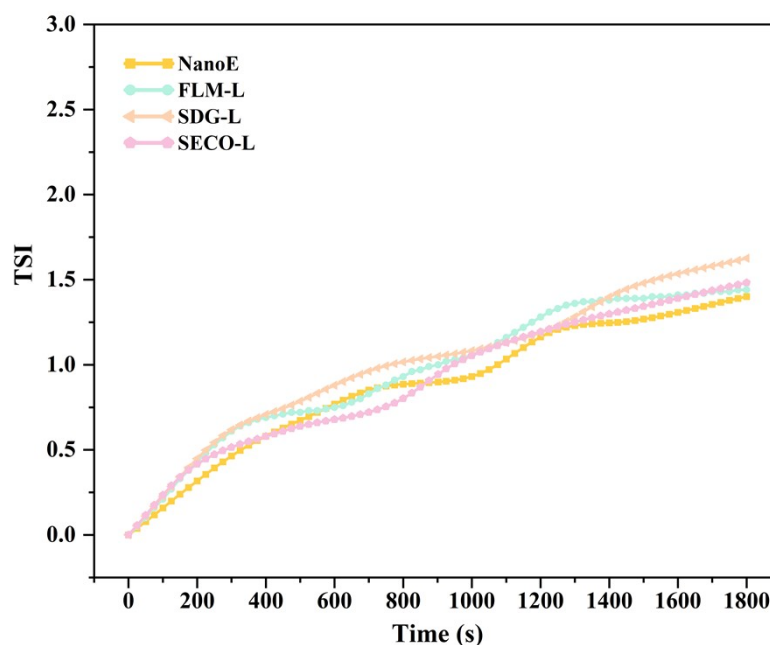

Supplement: d5fo03469h2.pdf [file d5fo03469h2.pdf]
